# Supplementary material for: Nitric Oxide, a Mediator of Inflammation, Suppresses Tumorigenesis
Source: Oxford University Press journal article supplement (doi:10.1158/0008-5472.can-04-2201), 2004-10-01
Supplement: 00085472can042201-sup-supplementary_table_1.xls [file 00085472can042201-sup-supplementary_table_1.xls]

## Sheet: Sheet1
Supplemental Table 1
Groups	Genotype	No. of Mice
1	p53-/- NOS2+/+	20
2	p53-/- NOS2+/-	20
3	p53-/- NOS2-/-	28
4	p53+/- NOS2+/+	20
5	p53+/-NOS2+/-	30
6	p53+/- NOS2-/-	30
7	p53+/+NOS2-/-	28
8	p53+/+ NOS2+/-	17
9	p53+/+ NOS2+/+	45
